# Supplementary material for: Anti-Inflammatory Effect of Methylpenicinoline from a Marine Isolate of Penicillium sp. (SF-5995): Inhibition of NF-κB and MAPK Pathways in Lipopolysaccharide-Induced RAW264.7 Macrophages and BV2 Microglia
Source: PubMed Central journal article supplement (PMC6271136; doi:10.3390/molecules191118073), 2014-11-05

# Supplementary Materials

Figure S1.  $^1\text{H}$ -NMR spectrum of compound 1 at 400 MHz in  $\text{CD}_3\text{OD}-d_6$ .

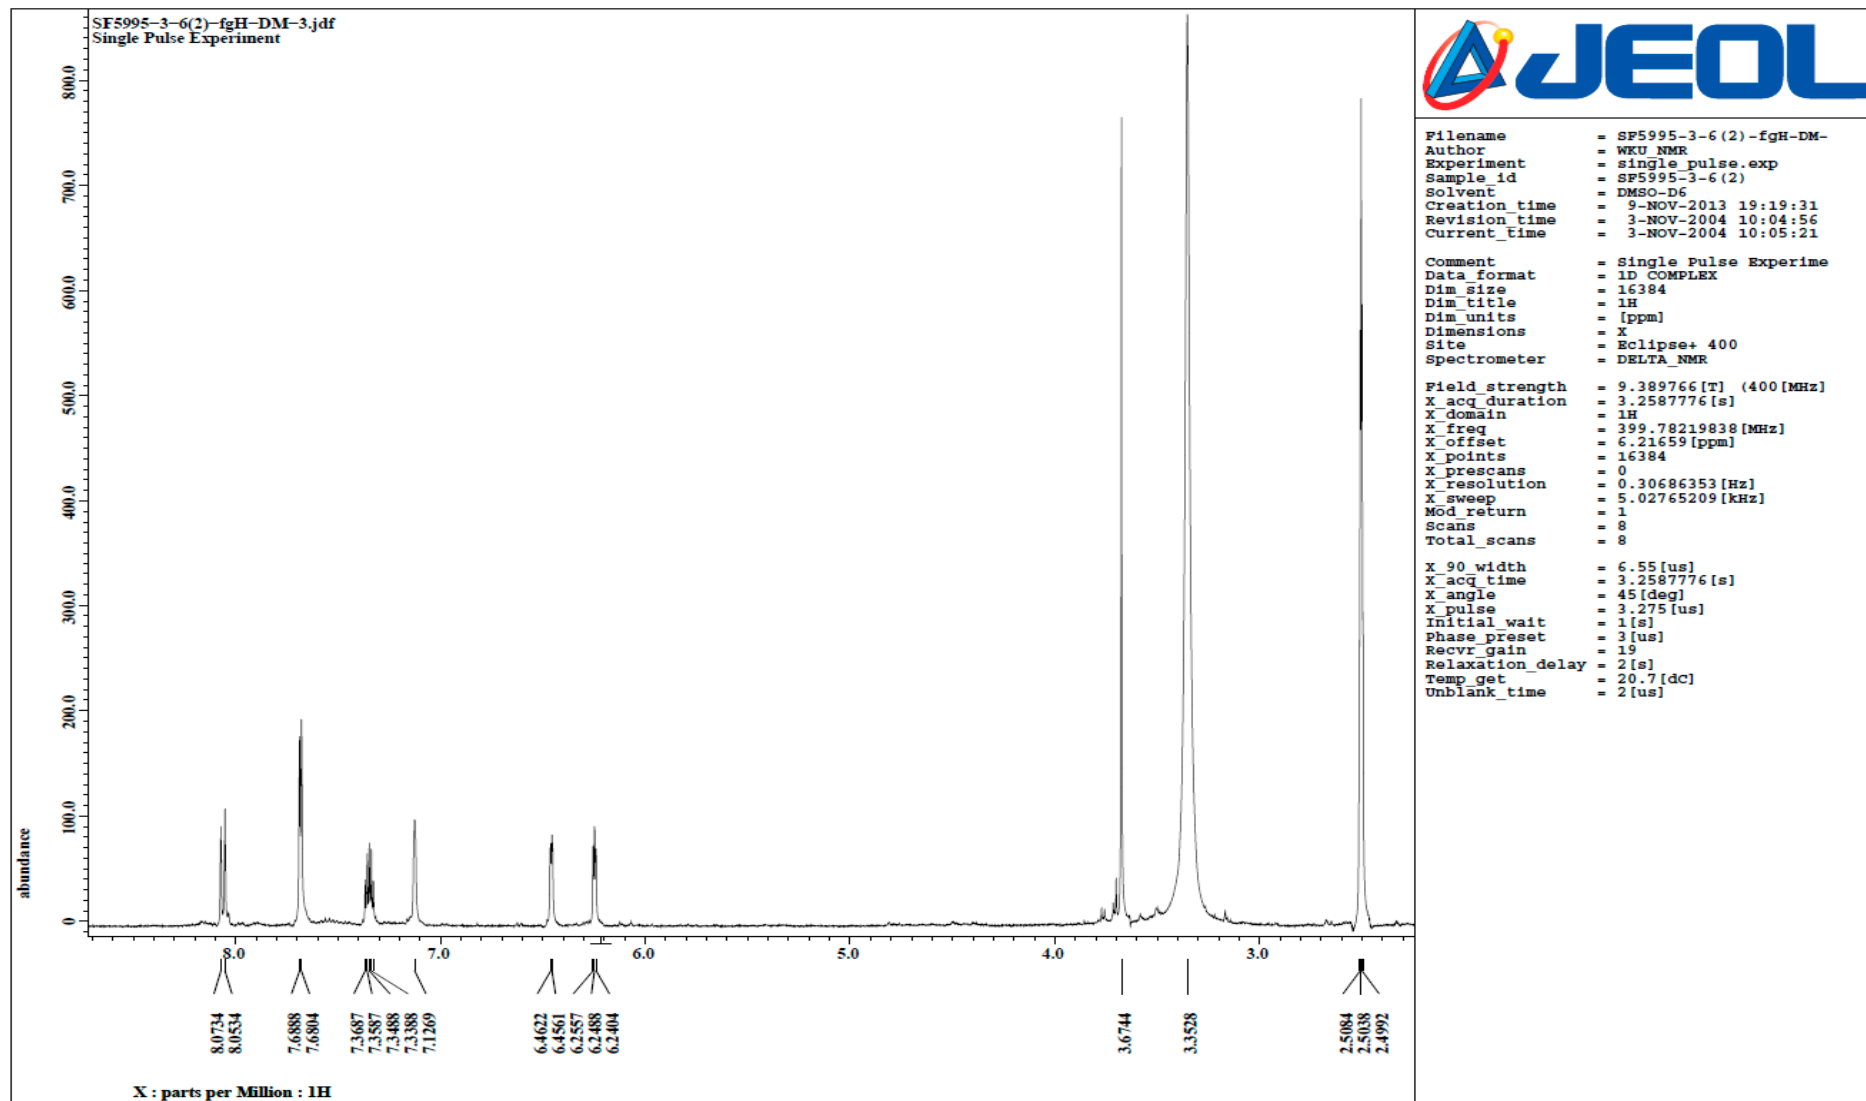

Figure S2.  $^{13}\text{C}$ -NMR spectrum of compound **1** at 100 MHz in  $\text{CD}_3\text{OD}-d_6$ .

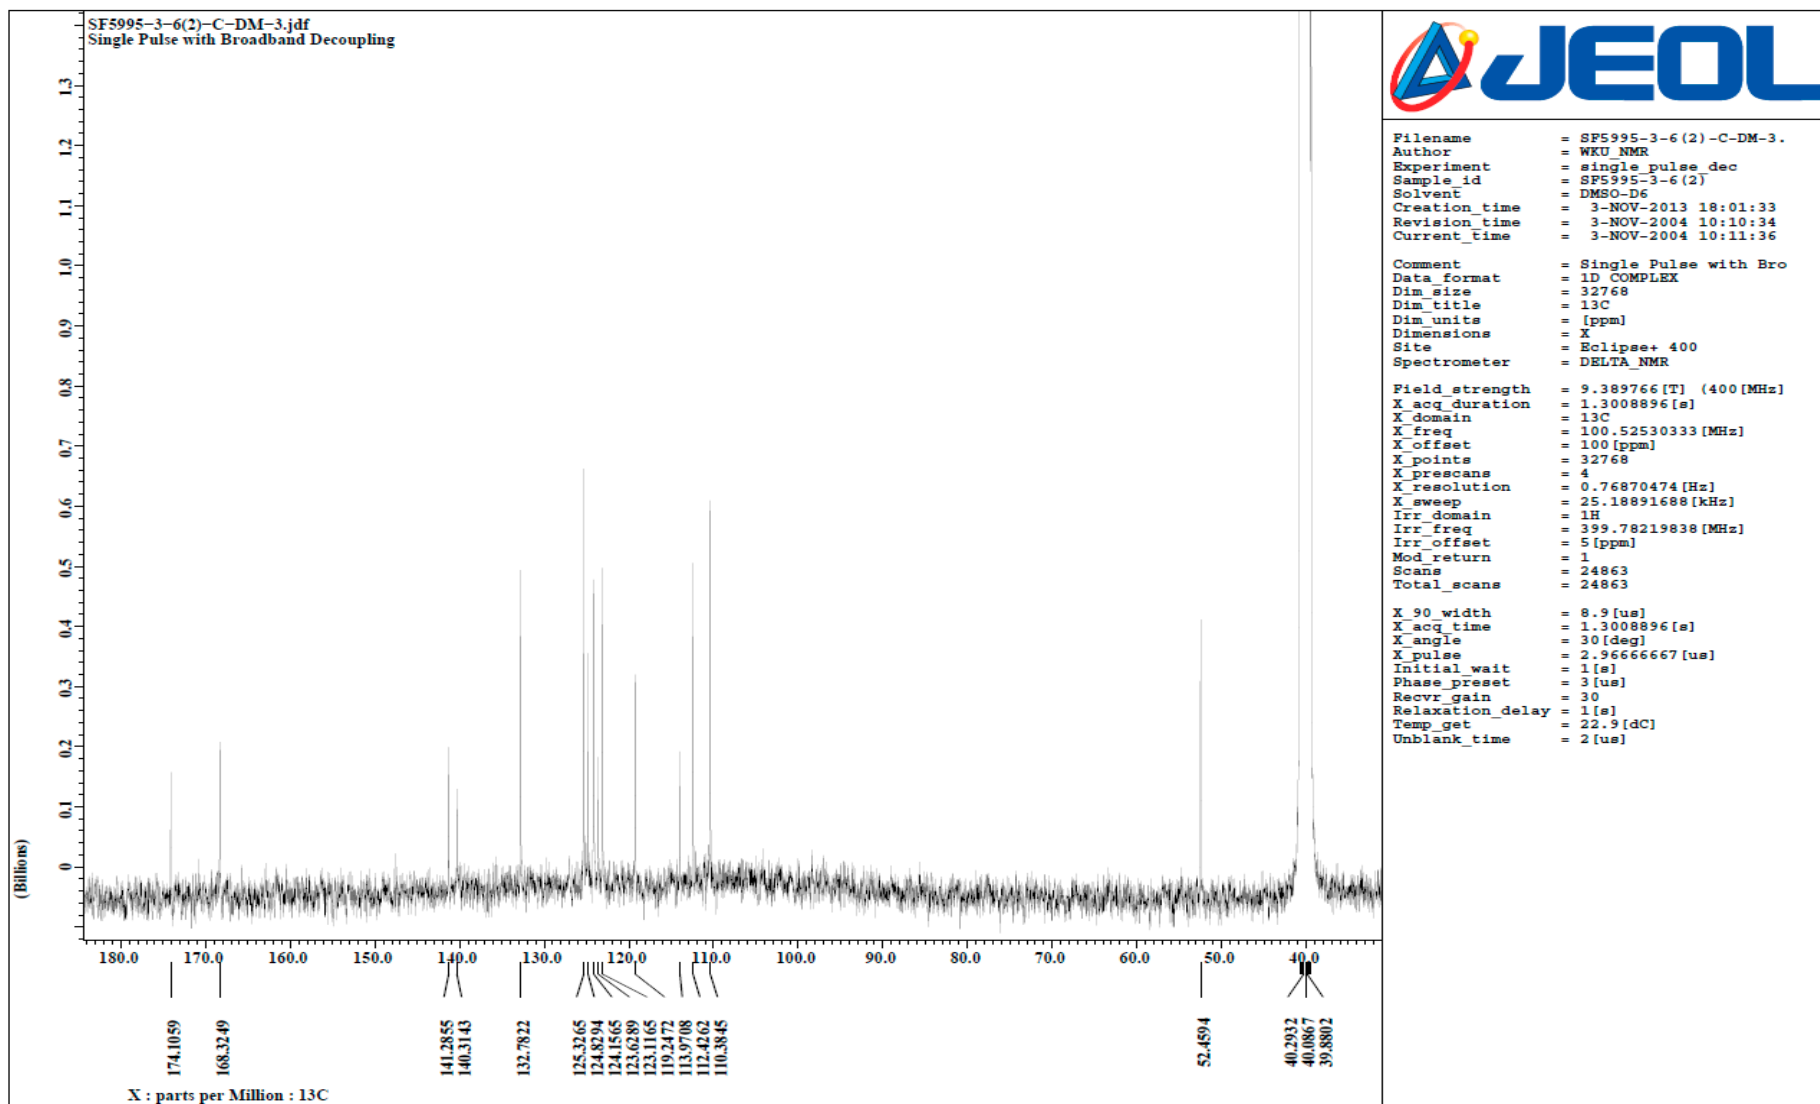

**Figure S3.** HR-ESIMS of compound 1.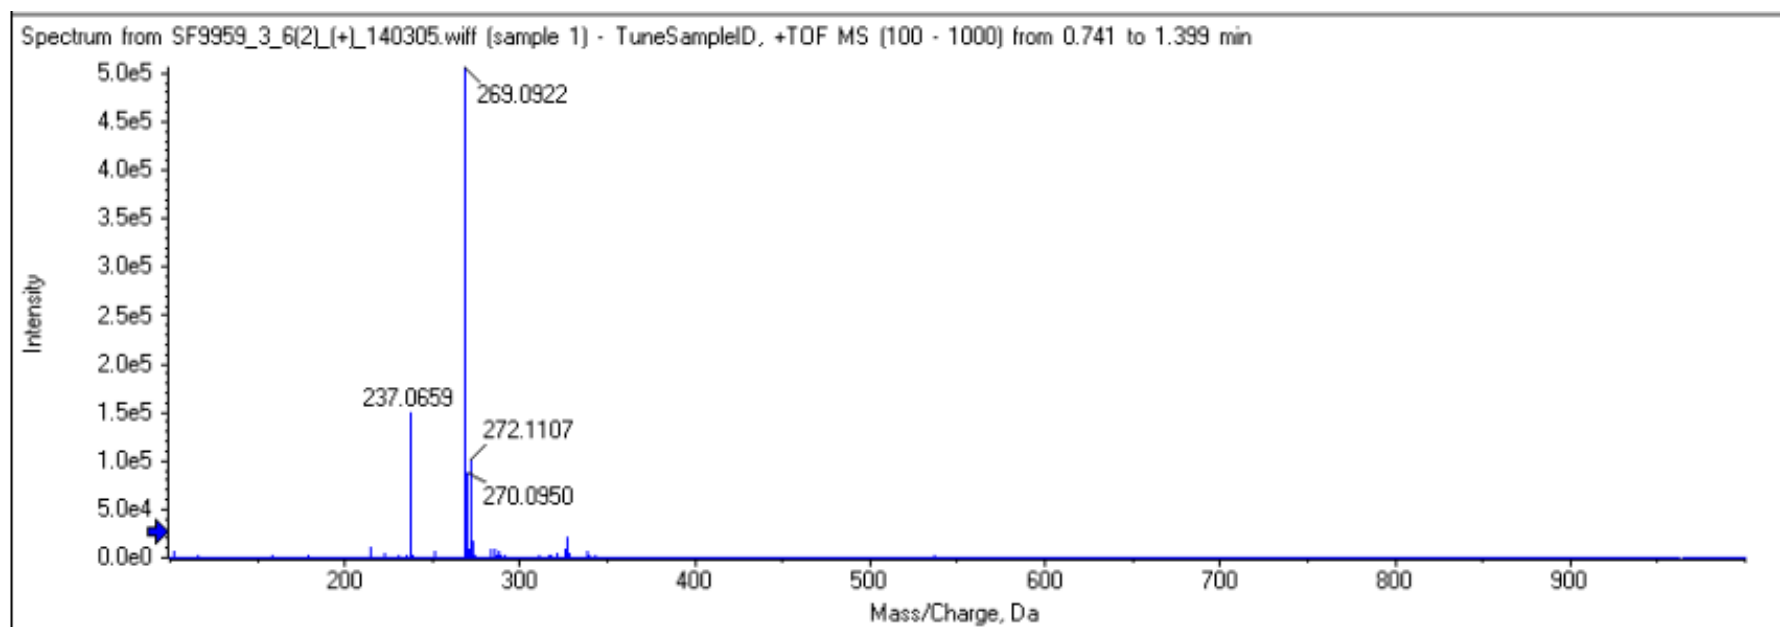

Supplement: molecules-19-18073-s001.pdf [file molecules-19-18073-s001.pdf]
